# Supplementary material for: Ethyl acetate extract of Ruta graveolens: a specific and potent inhibitor against the drug-resistant EGFR_T790M mutant in NSCLC
Source: Front Pharmacol. 2025 Apr 29;16:1570108. doi: 10.3389/fphar.2025.1570108 (PMC12069052; doi:10.3389/fphar.2025.1570108)
Supplement: Supplementary file 1 [file Table1.xlsx]

## Sheet: Crude EAE
Name	Formula	Annot. DeltaMass [ppm]	Calc. MW	m/z	RT [min]	MS2	Reference Ion	Area: Ruta-1.raw (F2)	Area: Ruta-2.raw (F3)	Area: Ruta-3.raw (F4)	Avarage	Class	Match factor
4,7,8-trimethoxyfuro[2,3-b]quinoline	C14 H13 N O4	3.11	259.085	260.093	8.982	DDA for preferred ion	[M+H]+1	6.48255e+10	6.28255e+10	7.10585e+10	6.62365e+10	Alkaloid	93.87
Aflaquinolone E	C16 H15 N O4	3.16	285.101	286.108	9.813	DDA for preferred ion	[M+H]+1	3.91833e+10	3.88158e+10	3.90602e+10	3.90197e+10	Alkaloid	95.08
Tensidol A	C13 H11 N O3	2.47	229.074	230.082	8.954	DDA for preferred ion	[M+H]+1	1.63413e+10	1.61189e+10	1.92367e+10	1.72323e+10	Other heterocyclic compound	92.36
3,3'-{[(4R,5S,6S,7R)-4,7-dibenzyl-5,6-dihydroxy-2-oxo-1,3-diazepane-1,3-diyl]dimethanediyl}dibenzamide	C35 H36 N4 O5	2.6	592.27	593.277	12.105	DDA for preferred ion	[M+H]+1	8.66349e+09	9.05119e+09	8.64129e+09	8.78532e+09	Other heterocyclic compound	87.47
Juglomycin C amide	C14 H13 N O5	3.15	275.08	276.088	8.524	DDA for preferred ion	[M+H]+1	8.39711e+09	8.05732e+09	8.07883e+09	8.17775e+09	Naphthoquinone	92.87
Bergapten	C12 H8 O4	3.22	216.043	217.05	9.272	DDA for preferred ion	[M+H]+1	7.17991e+09	7.52873e+09	7.3778e+09	7.36215e+09	Coumarin	91.62
6-(1,1-Dimethyl-2-propen-1-yl)-7H-furo[3,2-g][1]benzopyran-7-one	C16 H14 O3	3.5	254.095	255.102	10.548	DDA for preferred ion	[M+H]+1	4.86195e+09	5.3641e+09	5.44819e+09	5.22475e+09	Coumarin	89.34
14-hydroxyaflaquinolone F	C15 H13 N O4	2.9	271.085	272.093	8.855	DDA for preferred ion	[M+H]+1	3.81766e+09	3.86947e+09	3.78663e+09	3.82458e+09	quinolone derrivative	92.1
Daldiniside C	C17 H20 O9	2.19	368.112	369.119	7.348	DDA for preferred ion	[M+H]+1	2.33097e+09	2.45825e+09	2.61132e+09	2.46685e+09	Coumarin	93.83
3,4-dihydroxy-4-phenyl-1,3-dihydroquinolin-2-one	C15 H13 N O3	2.8	255.09	256.098	10.402	DDA for preferred ion	[M+H]+1	2.23001e+09	2.29225e+09	2.30372e+09	2.27533e+09	Alkaloid	85.74
Spathullin A	C13 H11 N O4	2.95	245.07	246.077	8.155	DDA for preferred ion	[M+H]+1	2.22162e+09	2.12701e+09	2.23283e+09	2.19382e+09	Alkaloid	92.18
(R)-Pentazocine	C19 H27 N O	3	285.21	286.217	10.802	DDA for preferred ion	[M+H]+1	1.3103e+09	1.30971e+09	1.32477e+09	1.31493e+09	Drug	84.68
(1R,2S)-2-{3-[(E)-2-(4-{[(2R,6S)-2,6-Dimethyl-4-morpholinyl]methyl}phenyl)vinyl]-1H-indazol-6-yl}-5'-methoxyspiro[cyclopropane-1,3'-indol]-2'(1'H)-one	C33 H34 N4 O3	2.4	534.264	535.272	12.568	DDA for preferred ion	[M+H]+1	1.31706e+09	1.29916e+09	1.28483e+09	1.30035e+09	Alkaloid	82.45
3-(3-hydroxy-4-methylpent-4-enyl)-3,5-dimethyl-11H-pyrano[3,2-a]carbazol-9-ol	C23 H25 N O3	2.35	363.184	364.192	10.428	DDA for preferred ion	[M+H]+1	1.12618e+09	1.18731e+09	1.16942e+09	1.16097e+09	Alkaloid	82.56
2-[(1E)-1-Dodecen-1-yl]-1-pentyl-4(1H)-quinolinone	C26 H39 N O	2.61	381.304	382.311	11.242	DDA for preferred ion	[M+H]+1	9.64897e+08	9.77713e+08	9.56987e+08	9.66532e+08	Quinolinone	86.75
5'-deoxyguanosine	C10 H13 N5 O4	2.57	267.097	268.105	1.594	DDA for preferred ion	[M+H]+1	9.10116e+08	9.18253e+08	9.13164e+08	9.13845e+08	Nucleoside	99
1-Butyl-6-[(4-{2-[(1-butyl-6-quinoliniumyl)amino]-2-oxoethoxy}benzoyl)amino]quinolinium	C35 H38 N4 O3	2.23	562.296	563.303	13.082	DDA for preferred ion	[M+H]+1	8.85623e+08	9.03792e+08	9.24291e+08	9.04569e+08	Quinolinone derivative	82.44
(3S,4S)-3-(Carboxymethyl)-4-[1-(4-fluoro-3-methylphenyl)vinyl]-L-proline	C16 H18 F N O4	-1.24	307.122	308.129	9.069	DDA for preferred ion	[M+H]+1	8.02074e+08	7.79731e+08	7.99982e+08	7.93929e+08	Amino acid derivative	91.19
4-Nitro-1,1′-biphenyl	C12 H9 N O2	2.87	199.064	200.071	9.306	DDA for preferred ion	[M+H]+1	6.44137e+08	6.36785e+08	6.33467e+08	6.3813e+08	Biphenyls	91.83
Phthalic anhydride	C8 H4 O3	2.58	148.016	149.024	12.054	DDA for preferred ion	[M+H]+1	6.17294e+08	6.55278e+08	6.40106e+08	6.37559e+08	Cyclic (aromatic) anhydride	93.95
2-(3-Methoxypropyl)-1,3-dioxo-5-isoindolinecarboxylic acid	C13 H13 N O5	2.55	263.08	264.087	7.546	DDA for preferred ion	[M+H]+1	5.96724e+08	6.16974e+08	6.1033e+08	6.0801e+08	Phthalimide derivative	93
3,3'-{[(4R,5S,6S,7R)-4,7-dibenzyl-5,6-dihydroxy-2-oxo-1,3-diazepane-1,3-diyl]dimethanediyl}bis(N-hydroxybenzamide)	C35 H36 N4 O7	1.81	624.26	625.267	11.942	DDA for preferred ion	[M+H]+1	5.62413e+08	4.87351e+08	5.03975e+08	5.17913e+08	NA	87.47
Cinnabaramide C	C19 H29 N O3	2.49	319.216	320.223	8.745	DDA for preferred ion	[M+H]+1	5.0719e+08	5.12103e+08	4.96959e+08	5.05417e+08	NA	92.47
3-(2’-acetoxy-3’- oxo-4’-methylpentyl)-indole	C16 H19 N O3	2.11	273.137	274.144	8.779	DDA for preferred ion	[M+H]+1	4.65416e+08	4.65874e+08	4.65427e+08	4.65572e+08	Alkaloid	90.89
Oxolinic acid	C13 H11 N O5	2.27	261.064	262.072	6.792	DDA for preferred ion	[M+H]+1	4.76852e+08	4.24208e+08	3.99477e+08	4.33512e+08	Quinolone	90.11
7-desmethyl-6-methylbostrycoidin	C15 H11 N O5	3.02	285.065	286.072	7.4	DDA for preferred ion	[M+H]+1	4.13342e+08	4.25257e+08	4.43846e+08	4.27481e+08	Quinolines.	91.86
(2E)-3-[4-({[1-({[3-Cyclopentyl-1-methyl-2-(2-pyridinyl)-1H-indol-6-yl]carbonyl}amino)cyclobutyl]carbonyl}amino)-2-isobutoxyphenyl]acrylic acid	C38 H42 N4 O5	1.92	634.317	635.324	12.693	DDA for preferred ion	[M+H]+1	3.95198e+08	4.14168e+08	4.07526e+08	4.05631e+08	Indole alkaloid	89.25
Benzyl 2-acetamido-3,4,6-tri-O-acetyl-2-deoxyhexopyranoside	C21 H27 N O9	1.73	437.169	438.177	1.638	DDA for preferred ion	[M+H]+1	3.63462e+08	3.76342e+08	3.7624e+08	3.72015e+08	Carbohydrate	96.57
1,3,5-trihydroxy-4-{[(2E)-3-(3-hydroxy-4-methoxyphenyl)prop-2-enoyl]oxy}cyclohexane-1-carboxylic acid	C17 H20 O9	2.87	368.112	367.104	6.685	DDA for preferred ion	[M-H]-1	3.91199e+08	3.52798e+08	3.64541e+08	3.69513e+08	NA	94.48
(1S,2R)-3-oxo-2-(2Z-pentenyl)cyclopentane-1-octanoic acid	C18 H30 O3	3.54	294.221	293.213	9.881	DDA for preferred ion	[M-H]-1	3.33114e+08	3.59769e+08	3.78514e+08	3.57132e+08	NA	89.38
5-Coumaroylquinic acid	C16 H18 O8	3.68	338.101	337.094	6.639	DDA for preferred ion	[M-H]-1	3.07335e+08	3.53e+08	3.20869e+08	3.27068e+08	NA	83.59
Undecylprodigiosin	C25 H35 N3 O	2.69	393.279	394.286	10.974	DDA for preferred ion	[M+H]+1	3.2257e+08	3.37425e+08	3.16673e+08	3.25556e+08	Alkaloid	90.93
3-({7-[(4-Fluorophenyl)amino]-4-nitro-2,1,3-benzoxadiazol-5-yl}amino)-1-propanol	C15 H14 F N5 O4	-4.3	347.101	348.109	7.612	DDA for preferred ion	[M+H]+1	3.2793e+08	3.09156e+08	3.25268e+08	3.20785e+08	quinic acid derivative	94.64
Cinnabaramide E	C19 H31 N O5	2.54	353.221	354.228	8.64	DDA for preferred ion	[M+H]+1	3.13155e+08	3.11387e+08	3.26356e+08	3.16966e+08	NA	91.43
2,6-Piperidinedione, 3-hydroxy-4-[2-(2-hydroxy-3,5-dimethylphenyl)-2-oxoethyl]-, trans	C15 H17 N O5	2.33	291.111	292.119	7.255	DDA for preferred ion	[M+H]+1	2.86069e+08	3.133e+08	3.29768e+08	3.09712e+08	Other heterocyclic compound	87.12
O-(17-carboxyheptadecanoyl)carnitine	C25 H47 N O6	2.43	457.341	458.349	10.479	DDA for preferred ion	[M+H]+1	2.98687e+08	3.0649e+08	3.02208e+08	3.02462e+08	Fatty acid derrivative	96.31
Penicitide B	C18 H34 O5	3.86	330.242	329.235	8.377	DDA for preferred ion	[M-H]-1	2.31464e+08	2.63239e+08	2.64646e+08	2.53117e+08	Peptide	91.12
Methoxsalen	C12 H8 O4	2.68	216.043	217.05	8.842	DDA for preferred ion	[M+H]+1	2.0191e+08	2.06874e+08	2.06737e+08	2.05174e+08	Coumarin	86.59
Speciosin T	C11 H16 O3	2.48	196.11	197.118	7.352	DDA for preferred ion	[M+H]+1	1.97358e+08	2.11854e+08	1.98099e+08	2.02437e+08	Alkaloid	94.2
3-epi-radicinin	C12 H12 O5	2.61	236.069	237.076	7.13	DDA for preferred ion	[M+H]+1	2.0225e+08	2.01248e+08	1.99762e+08	2.01087e+08	Terpenoid	93.24
[1-(2-{[(3beta)-3-Hydroxylup-20(29)-en-28-yl]oxy}-2-oxoethyl)cyclopentyl]acetic acid	C39 H62 O5	2.45	610.461	611.468	11.213	DDA for preferred ion	[M+H]+1	1.78839e+08	2.09975e+08	2.08166e+08	1.98993e+08	Terpenoid	91.67
Xylarinic acid A	C13 H22 O2	2.48	210.162	211.17	7.191	DDA for preferred ion	[M+H]+1	1.80631e+08	1.57789e+08	1.72939e+08	1.70453e+08	Corbohydrates	96.29
3-hydroxypropionic acid	C3 H6 O3	3.01	90.032	89.0247	1.39	DDA for preferred ion	[M-H]-1	1.35762e+08	1.97038e+08	1.71403e+08	1.68068e+08	NA	100
8-Phenyl-2,6,7,8-tetrahydroimidazo[2,1-c][1,2,4]triazine-3,4-dione	C11 H10 N4 O2	-3.58	230.08	231.087	6.974	DDA for preferred ion	[M+H]+1	1.61613e+08	2.08018e+08	1.30678e+08	1.6677e+08	Other heterocyclic compound	92.64
Psoralen	C11 H6 O3	2.55	186.032	187.039	6.58	DDA for preferred ion	[M+H]+1	1.64367e+08	1.60979e+08	1.62882e+08	1.62743e+08	Coumarin	88.17
Trehalamine	C7 H12 N2 O5	2.55	204.075	205.082	1.451	DDA for preferred ion	[M+H]+1	1.52575e+08	1.61383e+08	1.7202e+08	1.61993e+08	Other heterocyclic compound	94.43
1-(1-b-Glucopyranosyl)-1H-indole-3-acetic acid	C16 H19 N O7	2.31	337.117	338.124	6.033	DDA for preferred ion	[M+H]+1	1.78051e+08	1.15845e+08	1.77193e+08	1.5703e+08	Other heterocyclic compound	100
2-[4-[3-(4-methoxyphenyl)-1H-pyrazol-5-yl]-1-piperidinyl]-3-nitropyridine	C20 H21 N5 O3	-1.35	379.164	380.171	6.078	DDA for preferred ion	[M+H]+1	1.50259e+08	1.61723e+08	1.55289e+08	1.55757e+08	Other heterocyclic compound	84.88
Indole-3-acetic acid	C10 H9 N O2	2.41	175.064	176.071	6.028	DDA for preferred ion	[M+H]+1	1.94983e+08	1.30567e+08	1.25681e+08	1.50411e+08	Other heterocyclic compound	90.8
Cerarvensin	C20 H18 O9	3.1	402.096	401.089	8.925	DDA for preferred ion	[M-H]-1	1.3496e+08	1.50411e+08	1.56573e+08	1.47314e+08	Flavonoids	91.55
2-Ethyl-2,7-diazaspiro[4.4]nonan	C9 H18 N2	2.12	154.147	155.155	1.634	DDA for preferred ion	[M+H]+1	1.36363e+08	1.40408e+08	1.43254e+08	1.40009e+08	Other heterocyclic compound	94.15
Xylarinorditerpene R	C18 H28 O2	2.84	276.21	277.217	9.896	DDA for preferred ion	[M+H]+1	1.28902e+08	1.36196e+08	1.48177e+08	1.37758e+08	Terpenoid	94.58
Methyl [(S)-[(1S)-1-acetyl-2-oxocyclopentyl](3-fluorophenyl)methyl]carbamate	C16 H18 F N O4	-0.66	307.122	308.129	11.165	DDA for preferred ion	[M+H]+1	1.35536e+08	1.35808e+08	1.34179e+08	1.35174e+08	NA	88.45
Oleoyl Ethyl Amide	C20 H39 N O	2.74	309.304	310.311	11.698	DDA for preferred ion	[M+H]+1	1.33998e+08	1.32229e+08	1.36035e+08	1.34087e+08	Fatty acid amide	92.46
Eucalyptene A	C14 H14 O3	3.96	230.095	229.088	9.237	DDA for preferred ion	[M-H]-1	1.05197e+08	1.38347e+08	1.28645e+08	1.24063e+08	Terpenoid	90.73
1,3-dilinolenoylglycerol	C39 H64 O5	4.2	612.478	613.484	11.47	DDA for preferred ion	[M+H]+1	1.21529e+08	1.27844e+08	1.14934e+08	1.21435e+08	Fatty acid ester	92.08
Dimorphecolic acid	C18 H32 O3	3.43	296.236	295.229	10.116	DDA for preferred ion	[M-H]-1	1.10344e+08	1.14125e+08	1.37454e+08	1.20641e+08	Fatty acid amide	86.52
Chalciporone	C16 H21 N O	3.03	243.163	242.156	9.945	DDA for preferred ion	[M-H]-1	1.03287e+08	1.11564e+08	1.19878e+08	1.11576e+08	Quinone	88.39
3,8,9-trihydroxy-10-propyl-3,4,5,8,9,10-hexahydro-2H-oxecin-2-one	C12 H20 O5	2.95	244.132	243.125	7.457	DDA for preferred ion	[M-H]-1	9.74308e+07	1.07102e+08	1.16547e+08	1.07026e+08	Polyketide	92.3
M-hydroxyphenylacetic acid	C7 H6 O3	3.36	138.032	137.025	8.709	DDA for preferred ion	[M-H]-1	8.86129e+07	1.03916e+08	1.10425e+08	1.00985e+08	NA	95.41
Radinaphthalenone	C11 H10 O4	2.38	206.058	207.066	6.888	DDA for preferred ion	[M+H]+1	9.99941e+07	9.58719e+07	1.01993e+08	9.92862e+07	Quinone	80.07
Agrocybyne C	C8 H7 N O	2.54	133.053	134.06	8.145	DDA for preferred ion	[M+H]+1	9.26212e+07	9.01573e+07	9.40839e+07	9.22875e+07	Carboxamide	82.5
Citridone K	C12 H9 N O3	2.78	215.059	216.066	8.192	DDA for preferred ion	[M+H]+1	9.2364e+07	9.10173e+07	9.04419e+07	9.12744e+07	Alkaloid	90.88
2-[4-(2-Ethoxyethyl)-1-piperazinyl]-1-(4-fluorophenyl)ethanol	C16 H25 F N2 O2	-1.43	296.19	297.197	10.347	DDA for preferred ion	[M+H]+1	8.8563e+07	8.91939e+07	8.71463e+07	8.83011e+07	Other heterocyclic compound	83.96
(+)-asperglactam A	C18 H19 N O6	2.64	345.122	346.129	9.515	DDA for preferred ion	[M+H]+1	8.65669e+07	9.10494e+07	8.70336e+07	8.82166e+07	Polyketide	91.37
Variotin	C17 H25 N O3	3.52	291.184	290.177	10.992	DDA for preferred ion	[M-H]-1	8.28059e+07	8.80773e+07	9.29119e+07	8.79317e+07	Polyketide	86.72
2,6-bis(1-methylbenzimidazol-2-yl)pyridine	C21 H17 N5	-1.6	339.148	340.155	10.742	DDA for preferred ion	[M+H]+1	8.85992e+07	8.59704e+07	8.74965e+07	8.73554e+07	Other heterocyclic compound	91.63
2-[2-(4-Fluorophenyl)-3-(hydroxymethyl)-4-oxopyrazolo[1,5-a]pyrazin-5(4H)-yl]-N-(2-methyl-2-propanyl)acetamide	C19 H21 F N4 O3	-4.41	372.158	373.165	9.373	DDA for preferred ion	[M+H]+1	8.49866e+07	8.22269e+07	8.47771e+07	8.39969e+07	Other heterocyclic compound	99.05
Louisianin D	C11 H11 N O	2.46	173.084	174.092	6.883	DDA for preferred ion	[M+H]+1	8.11305e+07	8.22605e+07	8.33389e+07	8.22433e+07	Alkaloid	92.4
7-hydroxy-6-methoxy-2H-chromen-2-one	C10 H8 O4	2.64	192.043	193.05	6.294	DDA for preferred ion	[M+H]+1	7.63721e+07	7.56071e+07	8.71203e+07	7.96998e+07	Coumarin	80.68
(3R),(6R)-6-hydroxy-de-O-methyllasiodiplodin	C16 H22 O5	3.59	294.148	293.14	9.328	DDA for preferred ion	[M-H]-1	7.2357e+07	7.65364e+07	8.04863e+07	7.64599e+07	Macrolide	93.68
5-[5-(methoxycarbonyl)-5,8a-dimethyl-2-methylidene-decahydronaphthalen-1-yl]-3-methylpentanoic acid	C21 H34 O4	2.19	350.246	351.254	9.453	DDA for preferred ion	[M+H]+1	7.51507e+07	7.27688e+07	7.81334e+07	7.53509e+07	Terpenoid	90.46
{[(2'-{[(2R,3S,4R,5S,6R)-3,4,5-Trihydroxy-6-(hydroxymethyl)tetrahydro-2H-pyran-2-yl]oxy}-4-biphenylyl)carbonyl]amino}acetic acid	C21 H23 N O9	2.11	433.138	434.145	7.943	DDA for preferred ion	[M+H]+1	7.79395e+07	7.29489e+07	7.36344e+07	7.48409e+07	Biphenyls	100
THREONIC ACID, L-	C4 H8 O5	3.23	136.038	135.03	1.858	DDA for preferred ion	[M-H]-1	9.10095e+07	6.15427e+07	6.73314e+07	7.32945e+07	Corbohydrates	97.87
N-(1-{4-[(5S)-5-(Acetamidomethyl)-2-oxo-1,3-oxazolidin-3-yl]-2-fluorophenyl}-4-piperidinyl)-N-(5-nitro-2-furyl)acetamide	C23 H26 F N5 O7	-2.68	503.18	504.188	8.195	DDA for preferred ion	[M+H]+1	7.49452e+07	6.91248e+07	7.38581e+07	7.26427e+07	Oxazolidinone	98.36
N-[2-(4-{[2-(4-Fluorobenzyl)-5-methoxy-1-methyl-6-oxo-1,6-dihydro-4-pyrimidinyl]carbonyl}-1-piperazinyl)ethyl]-3,4,5-trihydroxybenzamide	C27 H30 F N5 O7	-2.44	555.212	556.219	7.141	DDA for preferred ion	[M+H]+1	7.85046e+07	7.00673e+07	6.92747e+07	7.26155e+07	Other heterocyclic compound	96.92
Rhamnetin	C16 H12 O7	2.45	316.059	317.066	7.143	DDA for preferred ion	[M+H]+1	7.52392e+07	6.65241e+07	7.56968e+07	7.24867e+07	Flavanoid	85.18
(3S,5S,6S)-Communiol C	C9 H16 O4	3.17	188.105	187.098	7.419	DDA for preferred ion	[M-H]-1	6.24968e+07	7.1282e+07	8.22652e+07	7.20147e+07	Polyketide	94.09
1-Phenylhept-3-en-4-one	C13 H16 O	2.51	188.121	189.128	5.885	DDA for preferred ion	[M+H]+1	7.20603e+07	6.88595e+07	6.73411e+07	6.94203e+07	NA	81.18
5-O-(Benzoylcarbamoyl)-1,2-O-isopropylidene-4-O-methyl-3-C-(2-methyl-2-oxiranyl)-beta-D-psicopyranose	C21 H27 N O9	2.01	437.169	438.177	5.591	DDA for preferred ion	[M+H]+1	6.74467e+07	6.90501e+07	6.84124e+07	6.83031e+07	Corbohydrates	94.73
Naphthalic anhydride	C12 H6 O3	2.42	198.032	199.039	10.548	DDA for preferred ion	[M+H]+1	5.9492e+07	6.85736e+07	6.92682e+07	6.57779e+07	Aromatic anhydride	82.34
N-[1-(2,6-Difluorophenyl)ethyl]-1-(ethylsulfonyl)-2-propanamine	C13 H19 F2 N O2 S	3.51	291.111	292.119	6.986	DDA for preferred ion	[M+H]+1	6.191e+07	6.55991e+07	6.1235e+07	6.29147e+07	NA	93.86
2,2'-[1,8-Octanediylbis(1,3,4-oxadiazole-5,2-diylmethyleneoxy)]di(1-naphthol)	C34 H34 N4 O6	2.56	594.249	595.257	11.814	DDA for preferred ion	[M+H]+1	6.00335e+07	5.85998e+07	6.16161e+07	6.00831e+07	Other heterocyclic compound	87.04
12-Hentriacontynoic acid	C31 H58 O2	2.32	462.445	463.452	12.831	DDA for preferred ion	[M+H]+1	5.99255e+07	5.52192e+07	6.4198e+07	5.97809e+07	fatty acid	96.8
	Alkaloid	12
	Coumarin	6
	Fattty acid derrivative	11
	Terpenoid	5
	Polyketide	4

## Sheet: EAE EGFR_TK
S.no	Name	Formula	Annot. DeltaMass [ppm]	Calc. MW	m/z	RT [min]	Area (Max.)	MS2	Reference Ion	Area: ESFR-TK-EAE-1.raw (F2)	Area: ESFR-TK-EAE-2.raw (F3)	Area: ESFR-TK-EAE-3.raw (F4)	Area: ESFR-TK-EAE-4.raw (F5)	Group Area: SAMPLE	Group CV [%]: SAMPLE	Class		MS/MS Match Factor
1	4-O-methylmelleolide	C24 H30 O6	1.51	414.205	415.212	8.284	4.42858e+09	DDA for preferred ion	[M+H]+1	4.20391e+09	4.35561e+09	4.42858e+09	4.26559e+09	4.3106e+09	2.292	Terpenoid		94.46
2	C16-Dihydroceramide	C34 H69 N O3	2.06	539.529	540.536	11.407	5.18339e+08	DDA for preferred ion	[M+H]+1	4.95399e+08	5.15295e+08	5.16333e+08	5.18339e+08	5.15814e+08	2.09321	Ceramide		84.33
3	C14-Dihydroceramide	C32 H65 N O3	1.94	511.497	512.505	11.068	4.95295e+08	DDA for preferred ion	[M+H]+1	4.70799e+08	4.73657e+08	4.70474e+08	4.95295e+08	4.72228e+08	2.49438	Ceramide		85.02
4	(Z)-Aconitic Acid	C6 H6 O6	-0.56	174.016	173.009	0.405	3.4956e+08	DDA for preferred ion	[M-H]-1	3.34607e+08	3.43175e+08	3.4956e+08	3.41625e+08	3.424e+08	1.794	Tricarboxylic acid		85.81
7	Indane	C9 H10	2.96	118.079	119.086	8.284	3.0088e+08	DDA for preferred ion	[M+H]+1	2.86398e+08	2.99084e+08	3.0088e+08	2.90082e+08	2.94583e+08	2.37414	Polycyclic hydrocarbon		90.01
8	N-octodecanoylsphinganine	C36 H73 N O3	1.84	567.56	568.567	11.733	1.88166e+08	DDA for preferred ion	[M+H]+1	1.88166e+08	1.81894e+08	1.77927e+08	1.8065e+08	1.81272e+08	2.37904	Ceramide		85.35
9	Zopfiellamide A	C25 H35 N O6	1.36	445.247	446.254	8.251	1.58894e+08	DDA for preferred ion	[M+H]+1	1.51169e+08	1.58894e+08	1.55228e+08	1.5626e+08	1.55744e+08	2.06485	Heterocyclic fatty acid		95.77
10	2-methyl butyl propyl phthalate	C16 H22 O4	2.23	278.152	279.16	9.576	1.19839e+08	DDA for preferred ion	[M+H]+1	1.17054e+08	1.18019e+08	1.18026e+08	1.19839e+08	1.18022e+08	0.983734	Phthalates		94.05
12	Varioxiranediol	C15 H20 O5	1.8	280.132	281.139	8.284	1.00885e+08	DDA for preferred ion	[M+H]+1	9.45763e+07	9.97572e+07	1.00885e+08	9.68363e+07	9.82968e+07	2.9148	Polyketide		97.07
13	(-)-alternarlactam	C14 H13 N O4	2.04	259.085	260.092	6.692	9.75872e+07	DDA for preferred ion	[M+H]+1	9.25784e+07	8.66912e+07	9.42536e+07	9.75872e+07	9.3416e+07	4.91555	Alkaloid		91.45
14	Didemethylasterriquinone D	C22 H14 N2 O4	-2.48	370.094	371.102	11.32	9.12359e+07	DDA for preferred ion	[M+H]+1	7.97039e+07	8.35385e+07	9.12359e+07	7.7962e+07	8.16212e+07	7.09517	alkaloid		81.34
15	N-dodecanoylsphinganine	C30 H61 N O3	1.69	483.466	484.473	10.688	7.1e+07	DDA for preferred ion	[M+H]+1	6.94345e+07	7.05262e+07	7.061e+07	7.1e+07	7.05681e+07	0.953664	Ceramide		86.85
16	N-eicosanoylsphinganine	C38 H77 N O3	1.81	595.591	596.599	12.094	6.09622e+07	DDA for preferred ion	[M+H]+1	5.88731e+07	5.72635e+07	5.1924e+07	6.09622e+07	5.80683e+07	6.74786	Ceramide		84.28
17	4-O-methylmelleolide	C24 H30 O6	1.64	414.205	415.212	8.022	5.75006e+07	DDA for preferred ion	[M+H]+1	5.44147e+07	5.75006e+07	5.57145e+07	5.65848e+07	5.61496e+07	2.34358	Sesquiterpenoid		95.3
18	Aflaquinolone E	C16 H15 N O4	1.95	285.101	286.108	7.435	4.5148e+07	DDA for preferred ion	[M+H]+1	4.45365e+07	4.4365e+07	4.5148e+07	4.45949e+07	4.45657e+07	0.758874	Alkaloid		87.17
20	Leu-Leu	C12 H24 N2 O3	1.28	244.179	245.186	4.52	3.51187e+07	DDA for preferred ion	[M+H]+1	3.23193e+07	2.5798e+07	3.51187e+07	2.7774e+07	3.00466e+07	14.0159	Peptide		95.69
21	8,9-dihydrolactimidomycin	C26 H37 N O6	1.79	459.263	460.27	8.021	2.81129e+07	DDA for preferred ion	[M+H]+1	2.66665e+07	2.58961e+07	2.58534e+07	2.81129e+07	2.62813e+07	3.96312	Polyketide		95.64
23	Alverine	C20 H27 N	1.79	281.215	282.222	11.244	2.11515e+07	DDA for preferred ion	[M+H]+1	2.02688e+07	1.88245e+07	2.11515e+07	2.04598e+07	2.03643e+07	4.84549	Drug		85.15
24	Ceramide (d18:1/20:0)	C38 H75 N O3	1.62	593.576	594.583	11.767	2.04801e+07	DDA for preferred ion	[M+H]+1	2.04801e+07	2.02538e+07	1.96722e+07	1.92016e+07	1.9963e+07	2.90295	Ceramide		84.88
27	Luteoride D	C18 H20 N2 O3	1.44	312.148	313.155	5.234	1.51107e+07	DDA for preferred ion	[M+H]+1	1.41509e+07	1.46197e+07	1.39446e+07	1.51107e+07	1.43853e+07	3.59457	Drug		95.39
29	Ceramide (d18:1/22:0)	C40 H79 N O3	1.41	621.607	622.614	12.106	1.48911e+07	DDA for preferred ion	[M+H]+1	1.40251e+07	1.3158e+07	1.36861e+07	1.48911e+07	1.38556e+07	5.21876	Ceramide		82.75
30	Fusariumin D	C22 H45 N O2	1.81	355.346	356.353	8.883	1.40665e+07	DDA for preferred ion	[M+H]+1	1.3457e+07	1.24226e+07	1.40665e+07	1.36825e+07	1.35698e+07	5.24288	Fatty acid derivative		85.93
31	Graveoline	C17 H13 N O3	1.99	279.09	280.097	5.867	1.38666e+07	DDA for preferred ion	[M+H]+1	1.37074e+07	1.38666e+07	1.27423e+07	1.31737e+07	1.34405e+07	3.84472	Alkaloids		90.11
32	Alverine	C20 H27 N	1.93	281.215	282.222	11.166	1.46834e+07	DDA for preferred ion	[M+H]+1	1.2353e+07	1.31362e+07	1.46834e+07	1.26214e+07	1.28788e+07	7.89395	Drug		85.62
33	Cedefingol	C20 H41 N O3	1.83	343.309	344.317	8.94	1.31309e+07	DDA for preferred ion	[M+H]+1	1.25152e+07	1.28132e+07	1.31309e+07	1.24478e+07	1.26642e+07	2.4569	Sphingolipid		84.3
34	Didemethylasterriquinone D	C22 H14 N2 O4	-2.33	370.094	371.102	10.544	1.15023e+07	DDA for preferred ion	[M+H]+1	1.03062e+07	1.08302e+07	1.09568e+07	1.15023e+07	1.08935e+07	4.50567	Alkaloid		80.15
35	N-docosanoylsphinganine	C40 H81 N O3	1.57	623.623	624.63	12.629	1.05138e+07	DDA for preferred ion	[M+H]+1	9.42103e+06	9.94655e+06	9.92501e+06	1.05138e+07	9.93578e+06	4.48751	Ceramide		82.99
36	Agglomerin B	C17 H24 O4	1.92	292.168	293.175	9.982	9.5523e+06	DDA for preferred ion	[M+H]+1	9.27724e+06	8.09588e+06	8.83144e+06	9.5523e+06	9.05434e+06	7.11317	Polyketide		95.59
37	Lumpidin	C26 H28 N4 O4	-3.33	460.21	459.202	8.283	9.16616e+06	DDA for preferred ion	[M-H]-1	9.16616e+06	7.88203e+06	8.91985e+06	9.07853e+06	8.99919e+06	6.79331	Alkaloid		100
39	Leucyltryptophan	C17 H23 N3 O3	1.6	317.174	318.182	5.176	8.95758e+06	DDA for preferred ion	[M+H]+1	8.00124e+06	7.77775e+06	7.31813e+06	8.95758e+06	7.8895e+06	8.61703	Peptide		100
40	Zopfiellamide A	C25 H35 N O6	1.78	445.247	446.255	8.019	7.98012e+06	DDA for preferred ion	[M+H]+1	7.5629e+06	7.60246e+06	7.64595e+06	7.98012e+06	7.6242e+06	2.48389	Pyrrolidinone derivative		100
41	Leucyl-leucyl-norleucine	C18 H35 N3 O4	0.99	357.263	358.271	5.512	7.72782e+06	DDA for preferred ion	[M+H]+1	7.65309e+06	6.94777e+06	7.72782e+06	7.50786e+06	7.58048e+06	4.73156	Peptide		100
42	Rutin	C27 H30 O16	0.74	610.154	609.146	5.317	7.18113e+06	DDA for preferred ion	[M-H]-1	6.73215e+06	7.01877e+06	7.18113e+06	7.12613e+06	7.07245e+06	2.85082	Flavonoid		94.21
43	APHE-4	C15 H16 N2 O	1.97	240.127	241.134	8.076	7.30237e+06	DDA for preferred ion	[M+H]+1	6.71382e+06	6.85644e+06	6.97666e+06	7.30237e+06	6.91655e+06	3.60323	Alkaloid		94.29
44	1-(Propyldisulfanyl)-1-(propylsulfinyl)propane	C9 H20 O S3	-2.99	240.067	239.06	7.341	7.44864e+06	DDA for preferred ion	[M-H]-1	6.54429e+06	6.49539e+06	7.44864e+06	7.11307e+06	6.82868e+06	6.67597	NA		89.68
45	1-Hexadecanoylpyrrolidine	C20 H39 N O	2.06	309.304	310.311	11.758	7.79108e+06	DDA for preferred ion	[M+H]+1	6.0887e+06	7.79108e+06	6.13231e+06	7.50774e+06	6.82003e+06	13.0257	n-acylpyrrolidine		92.4
46	Dragonamide C	C33 H57 N5 O6	-0.58	619.431	620.438	9.362	6.54076e+06	DDA for preferred ion	[M+H]+1	5.83037e+06	6.00245e+06	6.39632e+06	6.54076e+06	6.19938e+06	5.35655	Peptide		100
47	Thermolide E	C28 H53 N O8	1.82	531.378	532.385	9.394	5.99815e+06	DDA for preferred ion	[M+H]+1	5.18406e+06	5.49942e+06	5.42735e+06	5.99815e+06	5.46339e+06	6.18208	Polyketide		100
48	Palmitamide	C16 H33 N O	2.24	255.257	256.264	7.68	5.70757e+06	DDA for preferred ion	[M+H]+1	5.51985e+06	4.82578e+06	5.70757e+06	5.36196e+06	5.4409e+06	7.0846	Fatty acid amides		84.12
49	Graveoline	C17 H13 N O3	1.97	279.09	280.097	6.432	5.98361e+06	DDA for preferred ion	[M+H]+1	4.90512e+06	5.98361e+06	5.34849e+06	5.48403e+06	5.41626e+06	8.17731	Alkaloid		89.94
50	N-Undecanoylglycine	C13 H25 N O3	2.02	243.184	244.191	11.461	5.28212e+06	DDA for preferred ion	[M+H]+1	5.28212e+06	4.9888e+06	4.95466e+06	5.19377e+06	5.09129e+06	3.1046	Fatty acid derivative		100
52	(2E,4Z)-N-Isobutyl-2,4-octadecadienamide	C22 H41 N O	1.81	335.319	336.327	11.876	5.35184e+06	DDA for preferred ion	[M+H]+1	4.2835e+06	4.07688e+06	5.2463e+06	5.35184e+06	4.7649e+06	13.7751	Fatty acid amide		87.76
53	Indole-3-acetyl-epsilon-L-lysine	C16 H21 N3 O3	1.56	303.159	304.166	4.504	5.13914e+06	DDA for preferred ion	[M+H]+1	4.42722e+06	4.02731e+06	4.62316e+06	5.13914e+06	4.52519e+06	10.147	Alkaloid		90.2
54	Lauramine	C12 H25 N O	2.04	199.194	200.201	8.884	4.89979e+06	DDA for preferred ion	[M+H]+1	4.55828e+06	4.89979e+06	4.17731e+06	3.89415e+06	4.3678e+06	10.0253	Alkyl amine		82.77
55	Armillaramide	C34 H69 N O4	2.02	555.524	556.531	11.58	4.60963e+06	DDA for preferred ion	[M+H]+1	4.20573e+06	4.60963e+06	4.34923e+06	4.17686e+06	4.27748e+06	4.56181	Sphingolipids		88.09
56	Spirotryprostatin F	C22 H25 N3 O6	0.78	427.175	428.182	5.622	4.47656e+06	DDA for preferred ion	[M+H]+1	4.47656e+06	3.92533e+06	4.24196e+06	4.30428e+06	4.27312e+06	5.43483	Alkaloid		100
57	Phebestin	C24 H31 N3 O5	1.02	441.227	442.234	5.593	3.86616e+06	DDA for preferred ion	[M+H]+1	3.72792e+06	3.86616e+06	3.60449e+06	3.75367e+06	3.7408e+06	2.87293	Peptide		100
58	TMC-89B	C21 H36 N4 O9	-0.96	488.248	487.239	4.46	3.95628e+06	DDA for preferred ion	[M-H]-1	3.07119e+06	3.86209e+06	3.26197e+06	3.95628e+06	3.56203e+06	12.3648	Peptide		81.76
59	Cyclotryprostatin F	C23 H27 N3 O6	1.56	441.191	442.198	4.956	3.1413e+06	DDA for preferred ion	[M+H]+1	2.75862e+06	3.1413e+06	2.74468e+06	3.01854e+06	2.88858e+06	6.72627	Alkaloid		95.98
60	Fusaricate I	C14 H21 N O3	-0.17	251.152	250.145	9.757	2.85632e+06	DDA for preferred ion	[M-H]-1	2.72605e+06	2.73991e+06	2.7765e+06	2.85632e+06	2.7582e+06	2.10583	Pyrimidinecarboxylic acid		91.79
61	2-Fucosyllactose	C18 H32 O15	-2.82	488.173	489.18	6.649	2.55652e+06	DDA for preferred ion	[M+H]+1	2.27315e+06	2.30206e+06	2.55652e+06	2.41576e+06	2.35891e+06	5.39476	Oligosaccharide		100
62	Botryosphaerilactone A	C14 H24 O5	2.39	272.163	273.17	8.565	2.03518e+06	DDA for preferred ion	[M+H]+1	1.67386e+06	2.03518e+06	1.94958e+06	1.88937e+06	1.91948e+06	8.17036	NA		86.59
65	7-hydroxy-3-methoxyviridicatin	C16 H13 N O3	1.94	267.09	268.097	5.547	1.89623e+06	DDA for preferred ion	[M+H]+1	1.89623e+06	1.64262e+06	1.65018e+06	1.84124e+06	1.74571e+06	7.41652	Alkaloids		88.57
66	Delaminomycin A	C29 H43 N O6	1.83	501.31	502.317	9.108	1.7015e+06	DDA for preferred ion	[M+H]+1	1.33251e+06	1.43779e+06	1.7015e+06	1.67189e+06	1.55484e+06	11.702	Alkaloid		100
67	hydroxystilbamidine	C16 H16 N4 O	-2.65	280.132	281.139	8.021	1.57067e+06	DDA for preferred ion	[M+H]+1	1.46762e+06	1.54321e+06	1.57067e+06	1.55563e+06	1.54942e+06	2.98761	Alkaloid		100
68	4,5‐dihydroxy‐12‐methyloxacyclododecan‐2‐one	C12 H22 O4	0.33	230.152	229.145	7.144	1.89266e+06	DDA for preferred ion	[M-H]-1	1.5392e+06	1.4854e+06	1.41071e+06	1.89266e+06	1.5123e+06	13.5089	Macrolide		100
69	Biopterin-a-glucoside	C15 H21 N5 O8	0.51	399.139	400.146	7.793	1.33327e+06	DDA for preferred ion	[M+H]+1	1.20465e+06	1.30707e+06	1.33327e+06	1.30986e+06	1.30846e+06	4.44317	Pterin		100
					Alkaloid			a
					Ceramide
					Polyketide
					Fatty acid derrivative

## Sheet: EAE EGFR_T790M
S.no	Name	Formula	Annot. DeltaMass [ppm]	Calc. MW	m/z	RT [min]	Area (Max.)	MS2	Reference Ion	Area: T790M-EAE-1.raw (F2)	Area: T790M-EAE-2.raw (F3)	Area: T790M-EAE-3.raw (F4)	Area: T790M-EAE-4.raw (F5)	Group Area: SAMPLE	Group CV [%]: SAMPLE	Class		MS/MS Match Factor
62	(1S,2S,3R,4S,5R,6S)-2,3,4,6-Tetrahydroxy-5-methoxycyclohexyl 6-O-α-D-galactopyranosyl-α-D-galactopyranoside	C19 H34 O16	-2.7	518.183	519.191	6.792	2.75771e+06	DDA for preferred ion	[M+H]+1	2.3441e+06	2.64761e+06	2.51725e+06	2.75771e+06	2.58243e+06	6.93412	Disaccharide		89.9
32	(3S,5S,6S)-Communiol C	C9 H16 O4	0.37	188.105	187.098	5.748	1.64583e+07	DDA for preferred ion	[M-H]-1	1.60414e+07	1.46783e+07	1.62914e+07	1.64583e+07	1.61664e+07	5.11113	Oxolane		93.17
8	(Z)-Aconitic Acid	C6 H6 O6	-0.01	174.016	173.009	0.412	3.67662e+08	DDA for preferred ion	[M-H]-1	3.47144e+08	3.67662e+08	3.66727e+08	3.54276e+08	3.60501e+08	2.77471	Tricarboxylic acid		92.02
56	1-(Propyldisulfanyl)-1-(propylsulfinyl)propane	C9 H20 O S3	-2.45	240.067	239.06	13.093	3.46542e+06	DDA for preferred ion	[M-H]-1	3.15691e+06	3.46542e+06	3.0499e+06	3.24824e+06	3.20258e+06	5.46645	NA		91.67
31	1-Hexadecanoylpyrrolidine	C20 H39 N O	1.93	309.304	310.311	11.764	1.78495e+07	DDA for preferred ion	[M+H]+1	1.39522e+07	1.73097e+07	1.78495e+07	1.55474e+07	1.64285e+07	10.9656	Fatty Acid Amide		97.97
1	2-Aminoisobutyric Acid	C4 H9 N O2	2.04	103.064	104.071	0.398	5.33094e+09	DDA for preferred ion	[M+H]+1	5.07436e+09	5.14279e+09	5.33094e+09	5.21891e+09	5.18085e+09	2.1184	α-amino acid		83.15
2	2-Furoic acid	C5 H4 O3	0.47	112.016	111.009	0.424	2.84122e+09	DDA for preferred ion	[M-H]-1	2.66274e+09	2.84122e+09	2.66603e+09	2.69001e+09	2.67802e+09	3.1315	Furan derrivative		100
14	2-methyl butyl propyl phthalate	C16 H22 O4	2.17	278.152	279.16	9.576	1.34164e+08	DDA for preferred ion	[M+H]+1	1.23155e+08	1.24857e+08	1.30211e+08	1.34164e+08	1.27534e+08	3.93407	Phthalate		94.9
40	2-methylcitric acid	C7 H10 O7	-0.12	206.043	205.035	0.455	1.08406e+07	DDA for preferred ion	[M-H]-1	9.08364e+06	1.08406e+07	1.07736e+07	9.72972e+06	1.02516e+07	8.41903	Tricarboxylic acids		95.47
57	4,5‐dihydroxy‐12‐methyloxacyclododecan‐2‐one	C12 H22 O4	0.17	230.152	229.145	7.157	3.17747e+06	DDA for preferred ion	[M-H]-1	3.04954e+06	3.12137e+06	3.17062e+06	3.17747e+06	3.146e+06	1.88581	Macrolide		100
17	4,7,8-trimethoxyfuro[2,3-b]quinoline	C14 H13 N O4	2.33	259.085	260.092	6.718	1.27324e+08	DDA for preferred ion	[M+H]+1	1.2595e+08	1.25652e+08	1.27324e+08	1.24414e+08	1.25801e+08	0.949654	Alkaloid		92.2
63	7-Methyl-2,6,9,12-tetraoxahexadecane	C13 H28 O4	2.19	248.199	249.207	7.278	2.556e+06	DDA for preferred ion	[M+H]+1	1.93703e+06	2.46098e+06	2.53774e+06	2.556e+06	2.49936e+06	12.3688	Polyether		100
5	8,9-dihydrolactimidomycin	C26 H37 N O6	1.48	459.263	460.27	8.293	6.3738e+08	DDA for preferred ion	[M+H]+1	6.06666e+08	6.15776e+08	6.16356e+08	6.3738e+08	6.16066e+08	2.10068	Polyketides,		95.34
39	Agglomerin B	C17 H24 O4	2.11	292.168	293.175	9.975	1.21393e+07	DDA for preferred ion	[M+H]+1	9.95444e+06	1.06838e+07	1.21393e+07	1.12474e+07	1.09656e+07	8.3803	Polyketide		94.18
55	Anilofos	C13 H19 Cl N O3 P S2	2.21	367.024	368.031	8.993	3.58118e+06	DDA for preferred ion	[M+H]+1	3.10554e+06	3.3032e+06	3.58118e+06	3.37564e+06	3.33942e+06	5.87867	Organophosphate		81.4
42	Austrocolorone B	C34 H26 O10	2.83	594.154	595.162	14.682	7.45751e+06	DDA for preferred ion	[M+H]+1	6.34106e+06	7.4497e+06	7.45751e+06	6.7303e+06	7.09e+06	7.9101	Polyketide		92.84
21	Balticol F	C15 H18 O6	1.82	294.111	295.118	8.293	5.61964e+07	DDA for preferred ion	[M+H]+1	5.5574e+07	5.61964e+07	5.36477e+07	5.4891e+07	5.52325e+07	1.98271	Naphthalenone derivative		95.71
68	Biopterin-a-glucoside	C15 H21 N5 O8	0.7	399.139	400.147	7.801	1.75266e+06	DDA for preferred ion	[M+H]+1	1.73438e+06	1.75266e+06	1.71898e+06	1.55868e+06	1.72668e+06	5.28617	Pterins		84.26
65	Botryosphaerilactone A	C14 H24 O5	2.42	272.163	273.17	8.576	2.02676e+06	DDA for preferred ion	[M+H]+1	1.82826e+06	1.97021e+06	2.02676e+06	1.88025e+06	1.92523e+06	4.61906	NA		89.08
4	C14-Dihydroceramide	C32 H65 N O3	2.27	511.498	512.505	11.073	9.2605e+08	DDA for preferred ion	[M+H]+1	9.2605e+08	9.15748e+08	9.17195e+08	8.98888e+08	9.16471e+08	1.24033	Ceramide	Ceramide	85.24
3	C16-Dihydroceramide	C34 H69 N O3	2.06	539.529	540.536	11.411	1.02455e+09	DDA for preferred ion	[M+H]+1	9.91608e+08	1.00217e+09	1.01534e+09	1.02455e+09	1.00875e+09	1.4369	Ceramide		85.05
25	Cedefingol	C20 H41 N O3	2.05	343.309	344.317	8.943	3.4603e+07	DDA for preferred ion	[M+H]+1	3.4603e+07	3.41535e+07	3.30499e+07	3.43294e+07	3.42414e+07	2.00266	Aphingolipid		86.98
23	Ceramide (d18:1/20:0)	C38 H75 N O3	1.98	593.576	594.583	11.774	3.71155e+07	DDA for preferred ion	[M+H]+1	3.58989e+07	3.71155e+07	3.52463e+07	3.55331e+07	3.5716e+07	2.28819	Ceramide	Ceramide	83.87
27	Ceramide (d18:1/22:0)	C40 H79 N O3	1.59	621.607	622.614	12.121	2.54712e+07	DDA for preferred ion	[M+H]+1	2.54712e+07	2.5179e+07	2.4799e+07	2.38784e+07	2.4989e+07	2.78952	Ceramide.	Ceramide.	81.09
10	Chryxanthone B	C26 H28 O6	-4.03	436.187	437.194	8.23	2.13147e+08	DDA for preferred ion	[M+H]+1	2.06101e+08	2.13147e+08	2.01736e+08	2.05084e+08	2.05592e+08	2.32308	Xanthone		85.1
16	Cladoacetal B	C12 H12 O3	2.18	204.079	205.086	9.582	1.3372e+08	DDA for preferred ion	[M+H]+1	1.21968e+08	1.23867e+08	1.28854e+08	1.3372e+08	1.26361e+08	4.15543	Benzenoid		92.49
66	Communesin A	C28 H32 N4 O2	-1.07	456.252	457.259	9.108	1.98825e+06	DDA for preferred ion	[M+H]+1	1.91569e+06	1.90598e+06	1.87675e+06	1.98825e+06	1.91083e+06	2.46527	Alkaloids	Alkaloids	100
29	Cyprodenate	C13 H25 N O2	2.25	227.189	228.196	7.362	1.80384e+07	DDA for preferred ion	[M+H]+1	1.67939e+07	1.77564e+07	1.80384e+07	1.80318e+07	1.78941e+07	3.33611	Pyridine derivative		84.72
67	Cyprodenate	C13 H25 N O2	2.02	227.189	228.196	7.032	1.98709e+06	DDA for preferred ion	[M+H]+1	1.93152e+06	1.75714e+06	1.98709e+06	1.84426e+06	1.88789e+06	5.36285	Drug		100
69	Delaminomycin A	C29 H43 N O6	2.26	501.31	502.317	9.106	1.71964e+06	DDA for preferred ion	[M+H]+1	1.71964e+06	1.41112e+06	1.61143e+06	1.5543e+06	1.58287e+06	8.16271	Alkaloids	Alkaloids	100
18	Didemethylasterriquinone D	C22 H14 N2 O4	-2.33	370.094	371.102	11.324	1.07061e+08	DDA for preferred ion	[M+H]+1	8.79349e+07	9.42584e+07	1.07061e+08	1.03987e+08	9.91225e+07	8.96174	Alkaloid		86.68
35	Elaeokanine C	C12 H21 N O2	2.07	211.158	212.165	6.487	1.42179e+07	DDA for preferred ion	[M+H]+1	1.37706e+07	1.38678e+07	1.3744e+07	1.42179e+07	1.38192e+07	1.57174	Alkaloid		95.04
38	Fusariumin D	C22 H45 N O2	2.03	355.346	356.353	8.887	1.21008e+07	DDA for preferred ion	[M+H]+1	1.16697e+07	1.15793e+07	1.15004e+07	1.21008e+07	1.16245e+07	2.28739	Fatty acid derivative	Fatty acid derivative	88.95
28	Graveoline	C17 H13 N O3	2	279.09	280.097	6.551	2.49092e+07	DDA for preferred ion	[M+H]+1	2.26673e+07	2.49092e+07	2.07043e+07	2.47459e+07	2.37066e+07	8.53141	Alkaloid	Alkaloid	89.01
36	Graveoline	C17 H13 N O3	1.84	279.09	280.097	5.903	1.37738e+07	DDA for preferred ion	[M+H]+1	1.29703e+07	1.35524e+07	1.33035e+07	1.37738e+07	1.34279e+07	2.57413	Alkaloid	Alkaloid	88.87
9	Indane	C9 H10	3.07	118.079	119.086	8.294	2.85211e+08	DDA for preferred ion	[M+H]+1	2.82058e+08	2.85211e+08	2.79887e+08	2.7976e+08	2.80972e+08	0.904952	Polycyclic hydrocarbon		90.77
50	Lauramine	C12 H25 N O	2.23	199.194	200.201	8.885	8.07391e+06	DDA for preferred ion	[M+H]+1	4.37609e+06	4.40222e+06	4.38771e+06	4.83568e+06	4.39497e+06	4.97199	Alkyl amine		79.99
71	Medelamine A	C14 H31 N	2.09	213.246	214.253	7.731	1.57942e+06	DDA for preferred ion	[M+H]+1	1.39162e+06	1.38957e+06	1.50406e+06	1.57942e+06	1.44784e+06	6.31116	Alkaloid	Alkaloid	87.93
47	N-C18:0 Phytoceramide	C36 H73 N O4	2.61	583.555	584.563	11.385	4.89741e+06	DDA for preferred ion	[M+H]+1	4.7278e+06	4.89699e+06	4.85547e+06	4.89741e+06	4.87623e+06	1.65542	Ceramide	Ceramide	83.18
15	N-dodecanoylsphinganine	C30 H61 N O3	2.02	483.466	484.473	10.692	1.28076e+08	DDA for preferred ion	[M+H]+1	1.26162e+08	1.274e+08	1.25853e+08	1.28076e+08	1.26781e+08	0.823045	Ceramide		87.3
13	N-eicosanoylsphinganine	C38 H77 N O3	1.98	595.592	596.599	12.099	1.64394e+08	DDA for preferred ion	[M+H]+1	1.5432e+08	1.64394e+08	1.55552e+08	1.57874e+08	1.56713e+08	2.84001	Ceramide		84.68
72	Neoenactin NL2	C20 H40 N2 O5	-0.45	388.294	387.286	7.666	1.56745e+06	DDA for preferred ion	[M-H]-1	1.39148e+06	1.56745e+06	1.43003e+06	1.38035e+06	1.41076e+06	5.96866	Hydroxamic acid		100
46	Netilmicin	C21 H41 N5 O7	-0.79	475.3	476.308	5.079	6.02591e+06	DDA for preferred ion	[M+H]+1	5.42084e+06	5.62869e+06	6.02591e+06	5.59878e+06	5.61374e+06	4.50365	Aminoglycoside		100
7	N-octodecanoylsphinganine	C36 H73 N O3	1.74	567.56	568.567	11.737	4.35357e+08	DDA for preferred ion	[M+H]+1	4.3125e+08	4.35357e+08	4.27723e+08	4.11411e+08	4.29486e+08	2.46004	Ceramides	Ceramides	85.24
48	NP-003223	C19 H22 O4	1.92	314.152	315.16	8.228	5.25536e+06	DDA for preferred ion	[M+H]+1	5.25536e+06	4.32696e+06	5.05085e+06	4.31202e+06	4.6889e+06	10.3143	Anthraquinone		94.02
58	NP-006878	C15 H17 N O4	2.21	275.116	276.124	5.475	3.09521e+06	DDA for preferred ion	[M+H]+1	3.04005e+06	2.95707e+06	2.89785e+06	3.09521e+06	2.99856e+06	2.91612	Fatty acid derivative		100
37	NP-006989	C27 H30 O16	1.08	610.154	609.146	5.339	1.20609e+07	DDA for preferred ion	[M-H]-1	1.13285e+07	1.15694e+07	1.17306e+07	1.20609e+07	1.165e+07	2.6323	NA	NA	93.22
52	N-Undecanoylglycine	C13 H25 N O3	2.03	243.184	244.191	11.347	4.3713e+06	DDA for preferred ion	[M+H]+1	3.51837e+06	3.70013e+06	3.69386e+06	4.3713e+06	3.69699e+06	9.85291	Fatty acid amide	Fatty acid amide	100
30	Otonecine	C9 H15 N O3	1.91	185.106	186.113	0.474	1.90713e+07	DDA for preferred ion	[M+H]+1	1.50426e+07	1.90713e+07	1.635e+07	1.85132e+07	1.74316e+07	10.8981	Alkaloid	Alkaloid	87.11
49	Palmitamide	C16 H33 N O	2.4	255.257	256.264	7.692	4.53645e+06	DDA for preferred ion	[M+H]+1	4.21315e+06	4.53645e+06	4.36709e+06	4.48329e+06	4.42519e+06	3.25541	Fatty acid amide	Fatty acid amide	90.84
61	Penicitide B	C18 H34 O5	0.58	330.241	329.234	6.999	3.19054e+06	DDA for preferred ion	[M-H]-1	2.57293e+06	2.7946e+06	3.19054e+06	2.52498e+06	2.68377e+06	10.9535	Polyketide	Polyketide	90.92
74	Pyridinopyrone C	C21 H21 N O3	2.37	335.153	336.16	7.412	991270	DDA for preferred ion	[M+H]+1	991270	876045	900801	829244	888423	7.57129	Polyketide		100
73	Rimantadine	C12 H21 N	1.69	179.168	180.175	6.905	1.15887e+06	DDA for preferred ion	[M+H]+1	1.05072e+06	1.15887e+06	1.11399e+06	1.0747e+06	1.09435e+06	4.30715	Polyketide		84.24
22	Talaroenamine D	C16 H15 N O4	1.98	285.101	286.108	7.453	4.58517e+07	DDA for preferred ion	[M+H]+1	4.53551e+07	4.54686e+07	4.58517e+07	4.57758e+07	4.56222e+07	0.523247	Benzoyl derivatives		91.4
54	Thailanstatin A	C28 H41 N O9	2.08	535.279	536.287	8.026	3.58661e+06	DDA for preferred ion	[M+H]+1	3.21148e+06	3.49828e+06	3.22284e+06	3.58661e+06	3.36056e+06	5.65984	Polyketide	Polyketide	100
44	Thermolide E	C28 H53 N O8	1.99	531.378	532.385	9.394	6.91639e+06	DDA for preferred ion	[M+H]+1	6.24612e+06	6.91639e+06	5.5004e+06	6.34946e+06	6.29779e+06	9.30586	Polyketide	Polyketide	100
19	Varioxiranediol	C15 H20 O5	1.79	280.132	281.139	8.302	9.83348e+07	DDA for preferred ion	[M+H]+1	9.44826e+07	9.83348e+07	9.38506e+07	9.36733e+07	9.41666e+07	2.3074	Polyketide		95.69
53	Zopfiellamide A	C25 H35 N O6	2.08	445.247	446.255	8.035	3.48355e+06	DDA for preferred ion	[M+H]+1	3.2913e+06	3.48355e+06	3.4077e+06	3.41936e+06	3.41353e+06	2.35444	Pyrrolidinone derivative		100
								Alkaloid
								Ceramide
								Polyketide
								Fatty acid derrivative
